# Supplementary material for: Long-term stable stacked CsPbBr3quantum dot films for highly efficient white light generation in LEDs
Source: Royal Society of Chemistry journal article supplement (doi:10.1039/c6nr07410c), 2016-01-01
Supplement: c6nr07410c1.pdf [file c6nr07410c1.pdf]

## Long-term stable stacked CsPbBr<sub>3</sub> quantum dot film for highly efficient white light generation in LEDs

Young Hyun Song,<sup>a1</sup> Jin Sun Yoo,<sup>a1</sup> Bong Kyun Kang,<sup>a1</sup> Seung Hee Choi,<sup>a1</sup> Eun Kyung Ji,<sup>b</sup> Hyun Suk Jung<sup>a\*</sup> and Dae Ho Yoon<sup>a,b\*</sup>

<sup>a</sup>School of Advanced Materials Science and Engineering, Sungkyunkwan University, Suwon 440-746, Republic of Korea.  
Email: dhyoon@skku.edu, hsjung1@skku.edu

<sup>b</sup> SKKU Advanced Institute of Nanotechnology (SAINT), Sungkyunkwan University, Suwon 440-746, Republic of Korea  
Address here.

<sup>1</sup>These authors contributed equally.

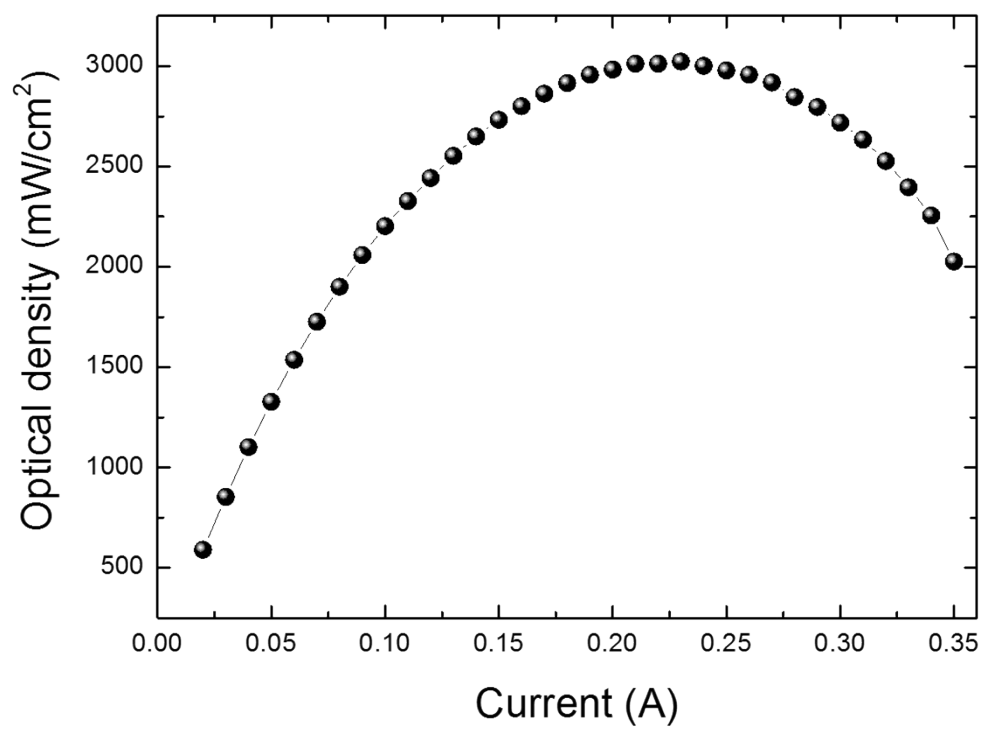

**Figure S1.** *Y.H. Song et al.*

Optical density of ECQD under blue light

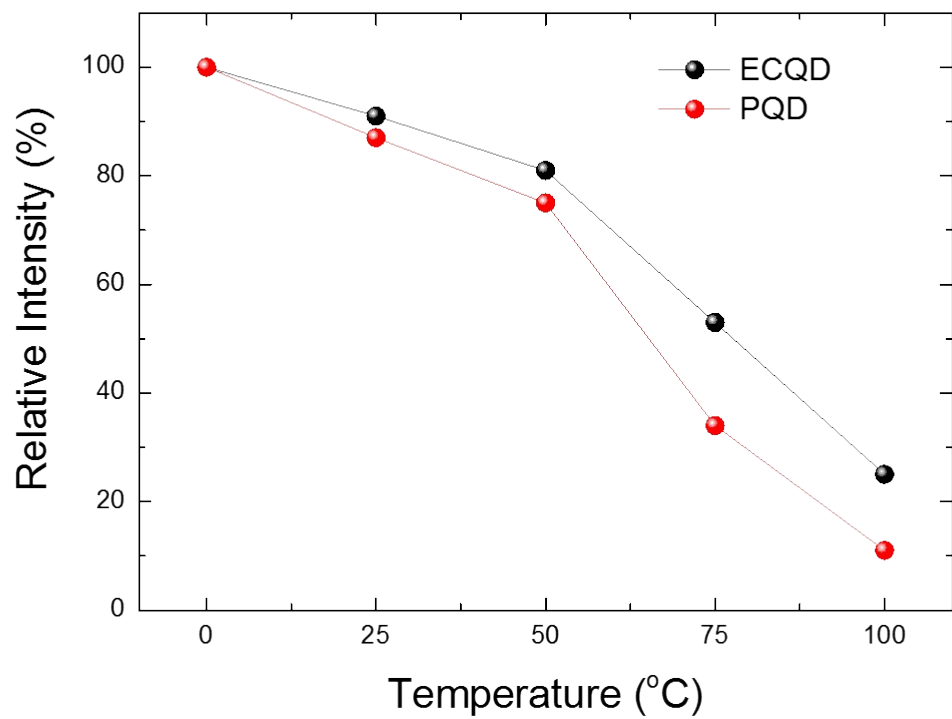

**Figure S2.** *Y.H. Song et al.*

Thermal stability test of ECQD
